# Supplementary material for: Systematic literature review and clinical validation of circulating microRNAs as diagnostic biomarkers for colorectal cancer
Source: PubMed Central journal article supplement (PMC5620259; doi:10.18632/oncotarget.19344), 2017-07-18
Supplement: oncotarget-08-68317-s001.pdf [file oncotarget-08-68317-s001.pdf]

## **Systematic literature review and clinical validation of circulating microRNAs as diagnostic biomarkers for colorectal cancer**

### **SUPPLEMENTARY MATERIALS**

**Supplementary Table 1: Characteristics of 26 CRC-related circulating miRNAs in reported studies.**

See Supplementary File 1

**Supplementary Table 2: Correlations between the levels of dysregulated miRNAs and the clinicopathological characteristics of colorectal cancer patients.**

See Supplementary File 2

**Supplementary Table 3: Sequences of the primers used for miRNAs in the study.**

See Supplementary File 3
